# Supplementary material
Source: publisher figshare collection journal article supplement (https://tandf.figshare.com/ndownloader/files/37568780)
Supplement: Supplementary file 1 [file 37568780]

## Sheet: top30
Supplementary Table 3 The top 30 transcripts from the turquoise and blue modules as determined by MM and GS values
Number	ENSEMBLTRANS	ENSEMBL	SYMBOL	geneTraitSignificance.GS.Adipose.	geneModuleMembership.MM.turquoise.
1	ENSBTAT00000024444	ENSBTAG00000018369	MYL2	-0.979157	0.986588
2	ENSBTAT00000018492	ENSBTAG00000013921	CKM	-0.995597	0.979502
3	ENSBTAT00000062950	ENSBTAG00000045757	TNNC1	-0.992828	0.98643
4	ENSBTAT00000007014	ENSBTAG00000005333	MB	-0.987712	0.990516
5	ENSBTAT00000061306	ENSBTAG00000009703	MYH7	-0.99571	0.979687
6	ENSBTAT00000015186	ENSBTAG00000011424	TPM2	-0.981012	0.982732
7	ENSBTAT00000015579	ENSBTAG00000011730	TCAP	-0.99005	0.979206
8	ENSBTAT00000038558	ENSBTAG00000007109	ASB2	-0.983541	0.980951
9	ENSBTAT00000010711	ENSBTAG00000008150	PKIA	-0.992045	0.979875
10	ENSBTAT00000001429	ENSBTAG00000001078	SRL	-0.992327	0.98124
11	ENSBTAT00000018099	ENSBTAG00000013614	TMEM38A	-0.983987	0.982034
12	ENSBTAT00000030791	ENSBTAG00000022699	CAV3	-0.991358	0.979674
13	ENSBTAT00000004980	ENSBTAG00000003826	SCN1B	-0.982194	0.986199
14	ENSBTAT00000052009	ENSBTAG00000027444	SVIL	-0.985255	0.985963
15	ENSBTAT00000061158	ENSBTAG00000010786	TACC2	-0.990841	0.979179
16	ENSBTAT00000002431	ENSBTAG00000001865	SGCG	-0.98163	0.989633
17	ENSBTAT00000029307	ENSBTAG00000021978	PARVB	-0.992632	0.983702
18	ENSBTAT00000005180	ENSBTAG00000003956	SGCA	-0.984895	0.984774
19	ENSBTAT00000012594	ENSBTAG00000009576	PACSIN3	-0.991785	0.980446
20	ENSBTAT00000025109	ENSBTAG00000018859	C18H19orf47	-0.98012	0.980545
21	ENSBTAT00000043067	ENSBTAG00000030520	PROB1	-0.990386	0.980869
22	ENSBTAT00000065236	-	-	-0.98927	0.985097
23	ENSBTAT00000010780	ENSBTAG00000008195	PHKG1	-0.980235	0.986352
24	ENSBTAT00000012735	ENSBTAG00000009663	YBX3	-0.986506	0.980923
25	ENSBTAT00000010935	ENSBTAG00000008301	WNK2	-0.977821	0.991572
26	ENSBTAT00000040247	ENSBTAG00000016221	AMOT	-0.981872	0.979708
27	ENSBTAT00000055460	ENSBTAG00000039684	CAVIN1	-0.979751	0.978094
28	ENSBTAT00000046976	ENSBTAG00000033089	HACD1	-0.987355	0.978115
29	ENSBTAT00000016981	ENSBTAG00000012777	SRF	-0.985636	0.983348
30	ENSBTAT00000021929	ENSBTAG00000016496	ZNF641	-0.987189	0.981493
